# Supplementary material for: Time-Course Transcriptome Study Reveals Mode of bZIP Transcription Factors on Light Exposure in Arabidopsis
Source: MDPI journal article supplement (doi:10.3390/ijms21061993), 2020-03-14
Supplement: s1 [file s1]

## Up-regulated

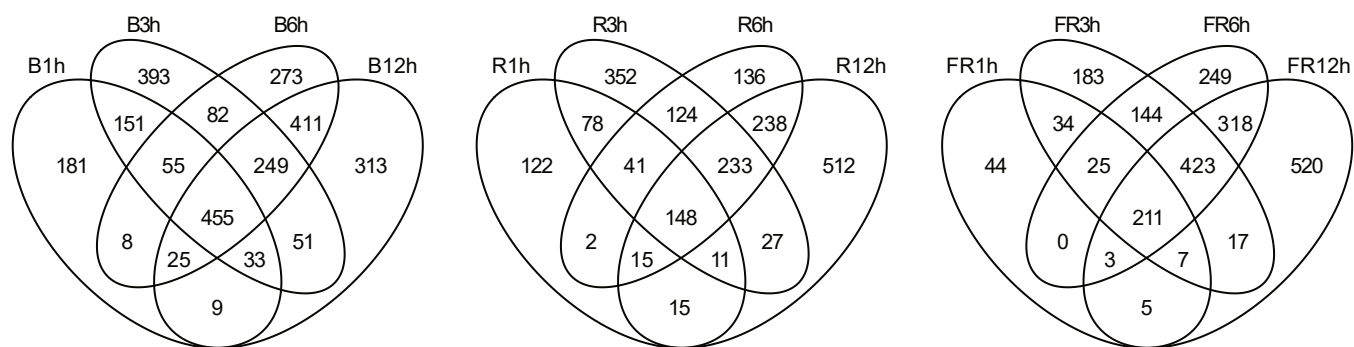

## Down-regulated

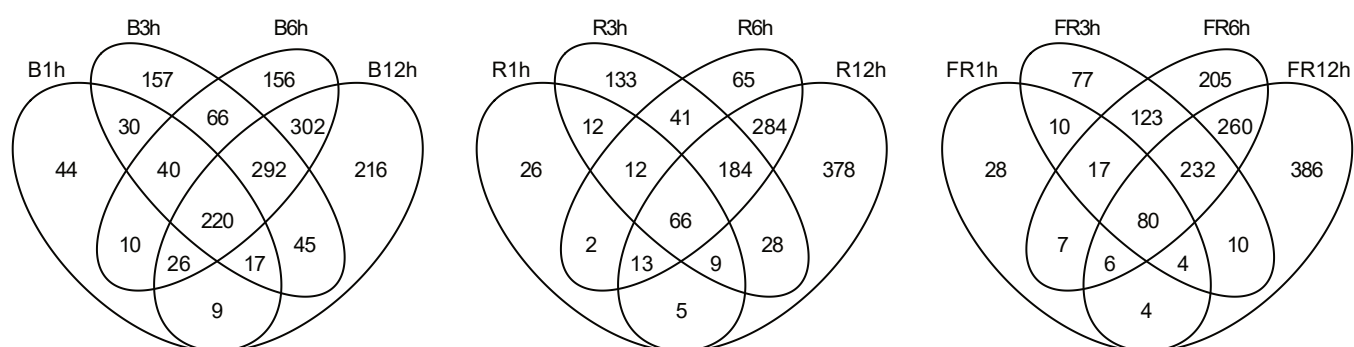

**Figure S1** Overlap of up-regulated and down-regulated genes from four time points for each light exposure. B=Blue, R=Red, FR=Far-Red.

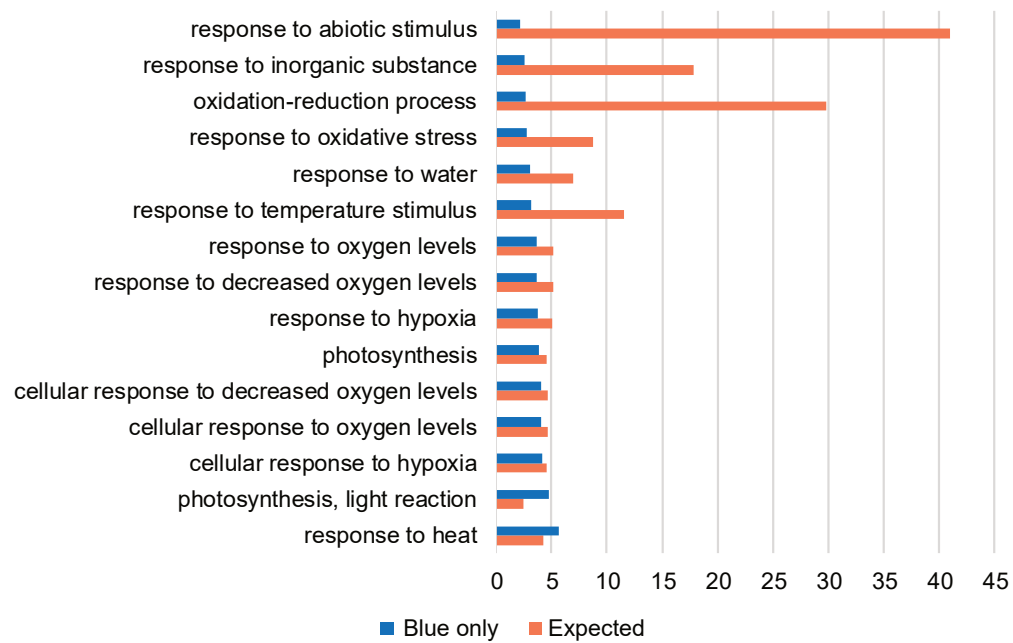

**Figure S2** Gene ontology analysis of independent DEGs on blue light exposure.

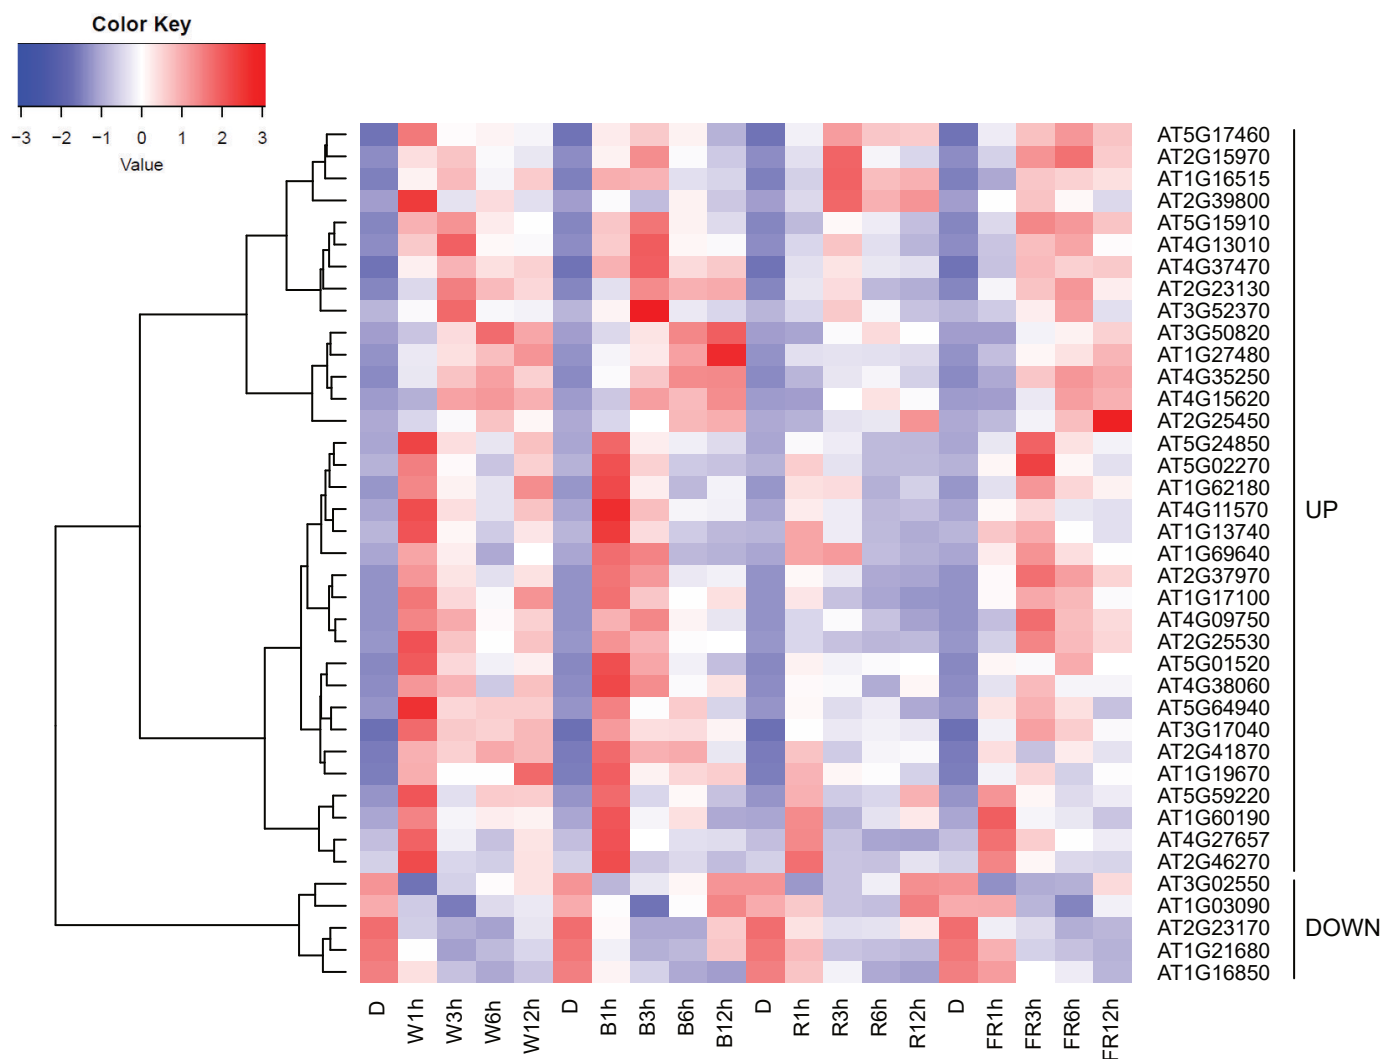

**Figure S3** Heatmap (Z-score data) showing time-course expression of 34 up-regulated and five down-regulated genes, which overlapped with 328 HY5-binding genes identified in Figure 3A, on exposure to light. D=Dark, W=White, B=Blue, R=Red, FR=Far-Red.

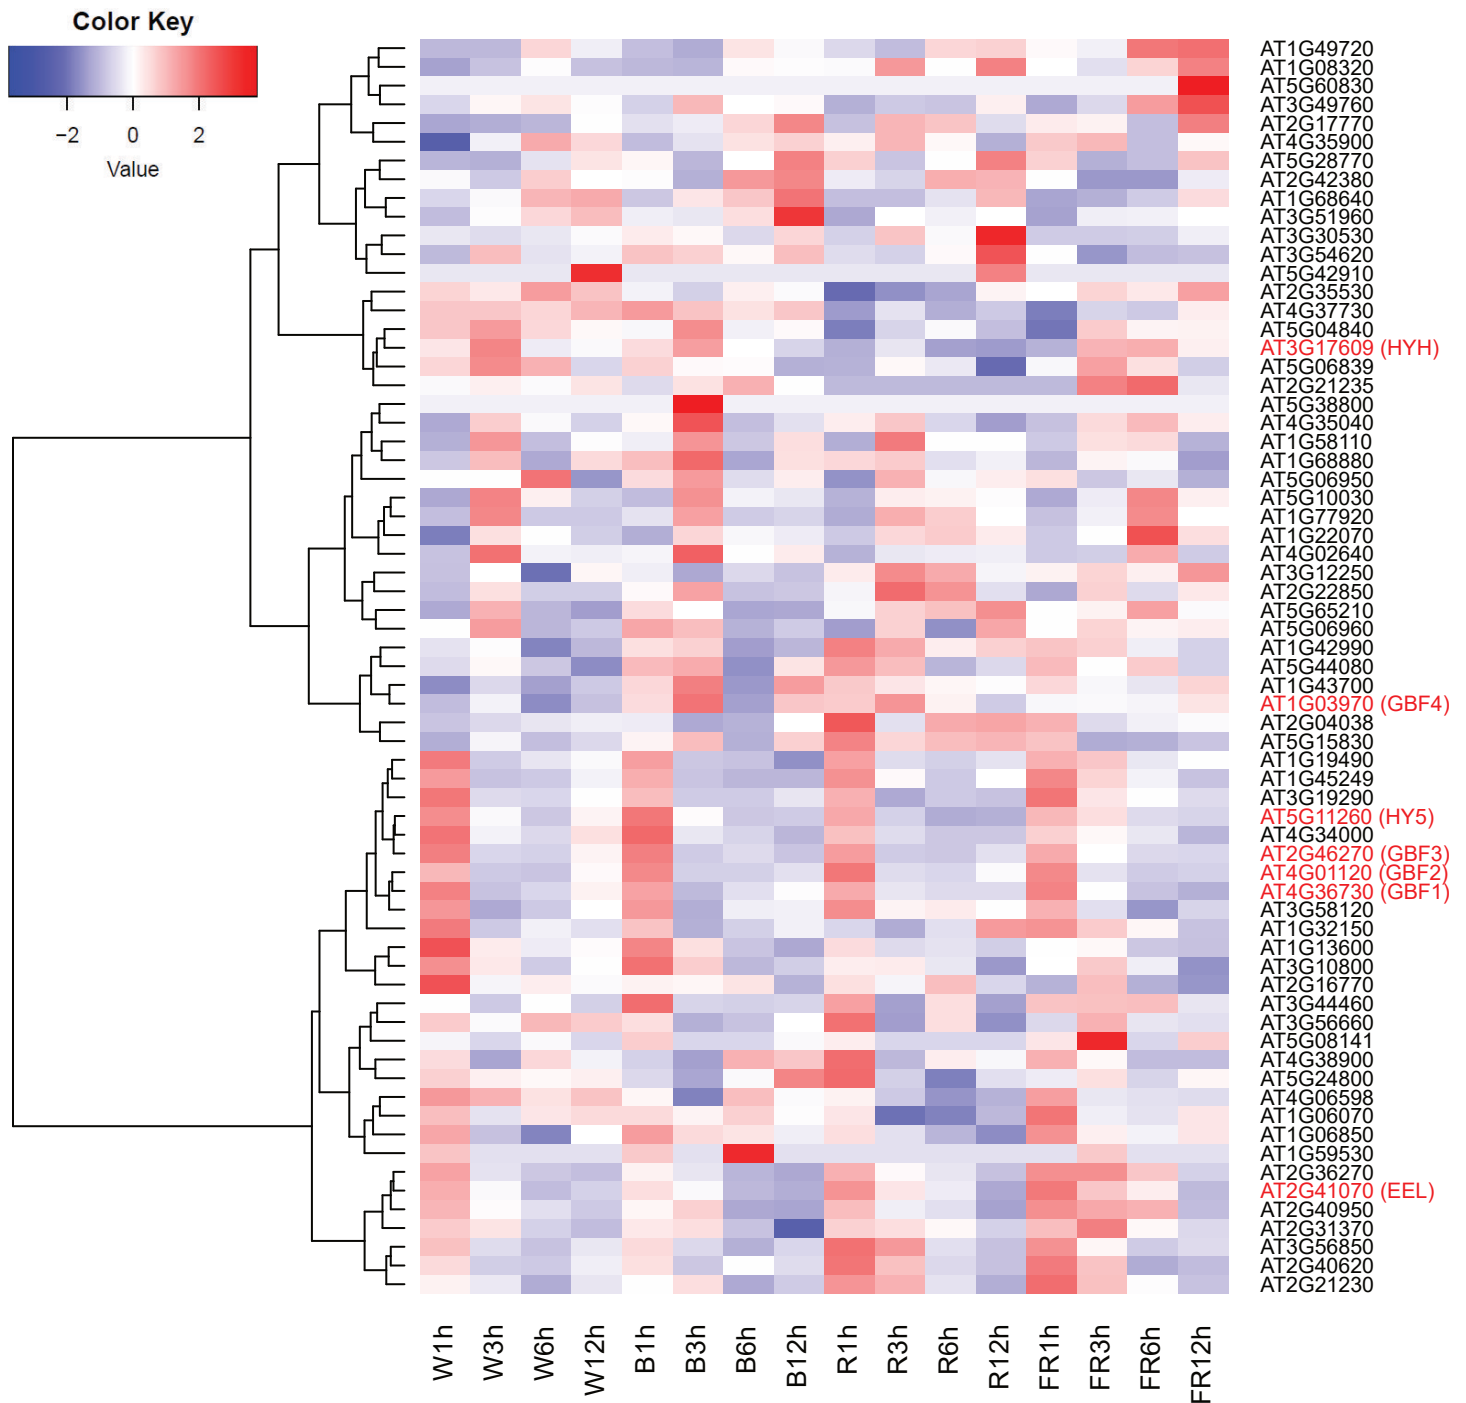

**Figure S4** Heatmap (Z-score data) showing time-course fold changes (light/dark) of 67 genes detected encoding bZIP TFs on exposure to light. W=White, B=Blue, R=Red, FR=Far-Red.

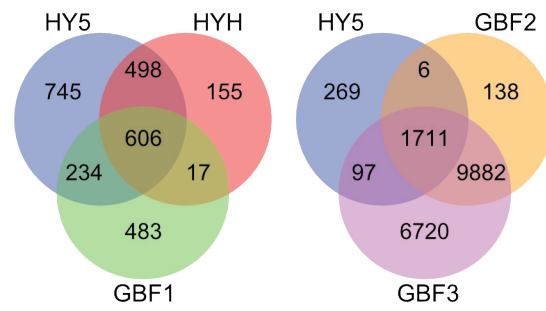

**Figure S5** Overlap of physical binding sites identified in gDB-seq analysis between HY5, HYH and GBF1, and HY5, GBF2 and GBF3.

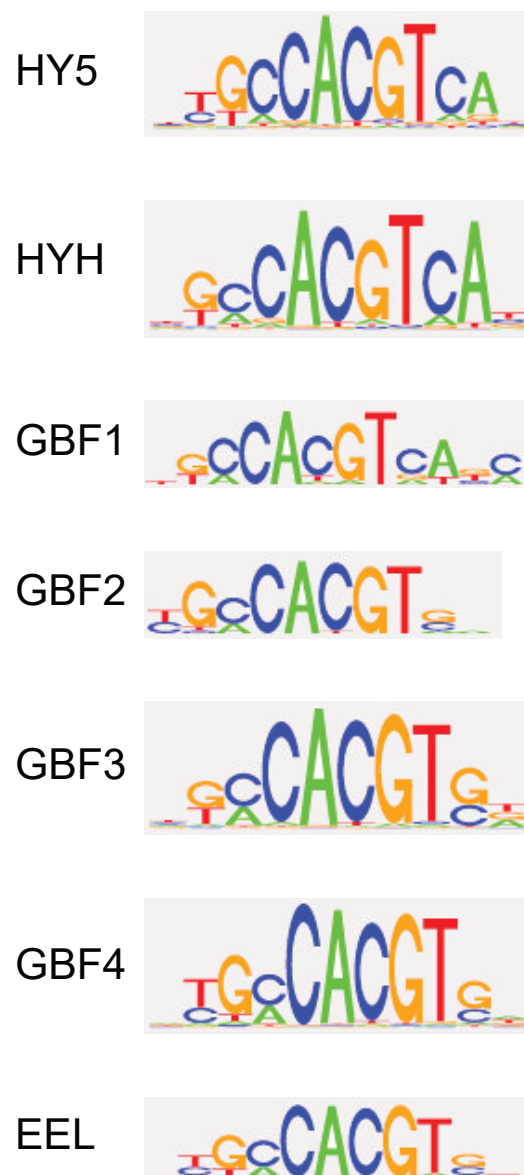

**Figure S6** Predicted binding motif sequences of the seven bZIP TFs from gDB-seq analysis.
